# Supplementary material
Source: publisher figshare collection journal article supplement (https://acs.figshare.com/ndownloader/files/4397035)
Supplement: Supplementary file 1 [file 4397035]

 
data_mg_28d 
 
_audit_creation_method            SHELXL-97 
_chemical_name_systematic 
; 
 ? 
; 
_chemical_name_common             'carbonyl diazide' 
_chemical_melting_point           ? 
_chemical_formula_moiety          ? 
_chemical_formula_sum 
 'C N6 O' 
_chemical_formula_weight          112.07 
 
loop_ 
 _atom_type_symbol 
 _atom_type_description 
 _atom_type_scat_dispersion_real 
 _atom_type_scat_dispersion_imag 
 _atom_type_scat_source 
 'C'  'C'   0.0181   0.0091 
 'International Tables Vol C Tables 4.2.6.8 and 6.1.1.4' 
 'N'  'N'   0.0311   0.0180 
 'International Tables Vol C Tables 4.2.6.8 and 6.1.1.4' 
 'O'  'O'   0.0492   0.0322 
 'International Tables Vol C Tables 4.2.6.8 and 6.1.1.4' 
 
_symmetry_cell_setting            orthorhombic 
_symmetry_space_group_name_H-M    Pnma 
 
loop_ 
 _symmetry_equiv_pos_as_xyz 
 'x, y, z' 
 '-x+1/2, -y, z+1/2' 
 '-x, y+1/2, -z' 
 'x+1/2, -y+1/2, -z+1/2' 
 '-x, -y, -z' 
 'x-1/2, y, -z-1/2' 
 'x, -y-1/2, z' 
 '-x-1/2, y-1/2, z-1/2' 
 
_cell_length_a                    5.431(2) 
_cell_length_b                    5.797(2) 
_cell_length_c                    13.800(4) 
_cell_angle_alpha                 90.00 
_cell_angle_beta                  90.00 
_cell_angle_gamma                 90.00 
_cell_volume                      434.5(3) 
_cell_formula_units_Z             4 
_cell_measurement_temperature     150(2) 
_cell_measurement_reflns_used     266
_cell_measurement_theta_min       3.1997
_cell_measurement_theta_max       60.7815
 
_exptl_crystal_description        needle 
_exptl_crystal_colour             colourless 
_exptl_crystal_size_max           0.116 
_exptl_crystal_size_mid           0.058 
_exptl_crystal_size_min           0.028 
_exptl_crystal_density_meas       ? 
_exptl_crystal_density_diffrn     1.713 
_exptl_crystal_density_method     'not measured' 
_exptl_crystal_F_000              224 
_exptl_absorpt_coefficient_mu     1.318 
_exptl_absorpt_correction_type    multi-scan 
_exptl_absorpt_correction_T_min   0.47308 
_exptl_absorpt_correction_T_max   1.00000 
_exptl_absorpt_process_details    
;
CrysAlisPro, Oxford Diffraction Ltd.,
Version 1.171.33.55 (release 05-01-2010 CrysAlis171 .NET)
(compiled Jan  5 2010,16:28:46)
Empirical absorption correction using spherical harmonics,
 implemented in SCALE3 ABSPACK scaling algorithm.
; 
_exptl_special_details 
; 
 ? 
; 
 
_diffrn_ambient_temperature       150(2) 
_diffrn_radiation_wavelength      1.54184 
_diffrn_radiation_type            CuK\a 
_diffrn_radiation_source          'Enhance Ultra (Cu) X-ray Source' 
_diffrn_radiation_monochromator   'mirror' 
_diffrn_measurement_device_type   'Xcalibur, Eos, Gemini ultra' 
_diffrn_measurement_method        ? 
_diffrn_detector_area_resol_mean  16.2705 
_diffrn_reflns_number             625 
_diffrn_reflns_av_R_equivalents   0.0228 
_diffrn_reflns_av_sigmaI/netI     0.0248 
_diffrn_reflns_limit_h_min        -3 
_diffrn_reflns_limit_h_max        6 
_diffrn_reflns_limit_k_min        -6 
_diffrn_reflns_limit_k_max        5 
_diffrn_reflns_limit_l_min        -15 
_diffrn_reflns_limit_l_max        15 
_diffrn_reflns_theta_min          6.41 
_diffrn_reflns_theta_max          60.87 
_reflns_number_total              361 
_reflns_number_gt                 282 
_reflns_threshold_expression      >2sigma(I) 
 
_computing_data_collection
;
CrysAlisPro, Oxford Diffraction Ltd.,
Version 1.171.33.55 (release 05-01-2010 CrysAlis171 .NET)
(compiled Jan  5 2010,16:28:46)
;
_computing_cell_refinement
;
CrysAlisPro, Oxford Diffraction Ltd.,
Version 1.171.33.55 (release 05-01-2010 CrysAlis171 .NET)
(compiled Jan  5 2010,16:28:46)
;
_computing_data_reduction
;
CrysAlisPro, Oxford Diffraction Ltd.,
Version 1.171.33.55 (release 05-01-2010 CrysAlis171 .NET)
(compiled Jan  5 2010,16:28:46)
;
_computing_structure_solution     'SHELXS-97 (Sheldrick, 2008)' 
_computing_structure_refinement   'SHELXL-97 (Sheldrick, 2008)' 
_computing_molecular_graphics     ? 
_computing_publication_material   ? 
 
_refine_special_details 
; 
 Refinement of F^2^ against ALL reflections.  The weighted R-factor wR and 
 goodness of fit S are based on F^2^, conventional R-factors R are based 
 on F, with F set to zero for negative F^2^. The threshold expression of 
 F^2^ > 2sigma(F^2^) is used only for calculating R-factors(gt) etc. and is 
 not relevant to the choice of reflections for refinement.  R-factors based 
 on F^2^ are statistically about twice as large as those based on F, and R- 
 factors based on ALL data will be even larger. 
; 
 
_refine_ls_structure_factor_coef  Fsqd  
_refine_ls_matrix_type            full 
_refine_ls_weighting_scheme       calc  
_refine_ls_weighting_details 
 'calc w=1/[\s^2^(Fo^2^)+(0.1478P)^2^+0.0000P] where P=(Fo^2^+2Fc^2^)/3' 
_atom_sites_solution_primary      direct 
_atom_sites_solution_secondary    difmap 
_refine_ls_extinction_method      none 
_refine_ls_extinction_coef        ? 
_refine_ls_number_reflns          361 
_refine_ls_number_parameters      49 
_refine_ls_number_restraints      0 
_refine_ls_R_factor_all           0.0732 
_refine_ls_R_factor_gt            0.0588 
_refine_ls_wR_factor_ref          0.2240 
_refine_ls_wR_factor_gt           0.2180 
_refine_ls_goodness_of_fit_ref    1.222 
_refine_ls_restrained_S_all       1.222 
_refine_ls_shift/su_max           0.000 
_refine_ls_shift/su_mean          0.000 
 
loop_ 
 _atom_site_label 
 _atom_site_type_symbol 
 _atom_site_fract_x 
 _atom_site_fract_y 
 _atom_site_fract_z 
 _atom_site_U_iso_or_equiv 
 _atom_site_adp_type 
 _atom_site_occupancy 
 _atom_site_symmetry_multiplicity 
 _atom_site_calc_flag 
 _atom_site_refinement_flags 
 _atom_site_disorder_assembly 
 _atom_site_disorder_group 
O1 O 0.4415(7) 0.7500 1.0574(3) 0.0396(14) Uani 1 2 d S . . 
C1 C 0.2674(9) 0.7500 1.0038(4) 0.0336(15) Uani 1 2 d S . . 
N1 N 0.2711(9) 0.7500 0.9019(3) 0.0371(14) Uani 1 2 d S . . 
N2 N 0.4907(9) 0.7500 0.8693(3) 0.0354(14) Uani 1 2 d S . . 
N3 N 0.6704(10) 0.7500 0.8308(3) 0.0449(16) Uani 1 2 d S . . 
N4 N 0.0160(8) 0.7500 1.0298(3) 0.0375(14) Uani 1 2 d S . . 
N5 N -0.0125(8) 0.7500 1.1208(3) 0.0364(15) Uani 1 2 d S . . 
N6 N -0.0637(9) 0.7500 1.1988(4) 0.0488(15) Uani 1 2 d S . . 
 
loop_ 
 _atom_site_aniso_label 
 _atom_site_aniso_U_11 
 _atom_site_aniso_U_22 
 _atom_site_aniso_U_33 
 _atom_site_aniso_U_23 
 _atom_site_aniso_U_13 
 _atom_site_aniso_U_12 
O1 0.023(2) 0.052(2) 0.044(2) 0.000 -0.0047(17) 0.000 
C1 0.028(3) 0.028(3) 0.044(3) 0.000 -0.001(3) 0.000 
N1 0.022(3) 0.047(2) 0.042(3) 0.000 0.001(2) 0.000 
N2 0.032(3) 0.040(2) 0.035(3) 0.000 -0.001(2) 0.000 
N3 0.031(3) 0.059(3) 0.044(3) 0.000 0.005(2) 0.000 
N4 0.024(3) 0.047(2) 0.042(3) 0.000 -0.003(2) 0.000 
N5 0.021(3) 0.040(2) 0.048(3) 0.000 0.001(2) 0.000 
N6 0.032(3) 0.064(3) 0.050(3) 0.000 0.007(3) 0.000 
 
_geom_special_details 
; 
 All esds (except the esd in the dihedral angle between two l.s. planes) 
 are estimated using the full covariance matrix.  The cell esds are taken 
 into account individually in the estimation of esds in distances, angles 
 and torsion angles; correlations between esds in cell parameters are only 
 used when they are defined by crystal symmetry.  An approximate (isotropic) 
 treatment of cell esds is used for estimating esds involving l.s. planes. 
; 
 
loop_ 
 _geom_bond_atom_site_label_1 
 _geom_bond_atom_site_label_2 
 _geom_bond_distance 
 _geom_bond_site_symmetry_2 
 _geom_bond_publ_flag 
O1 C1 1.200(6) . ? 
C1 N1 1.407(8) . ? 
C1 N4 1.412(7) . ? 
N1 N2 1.274(7) . ? 
N2 N3 1.111(7) . ? 
N4 N5 1.265(7) . ? 
N5 N6 1.111(6) . ? 
 
loop_ 
 _geom_angle_atom_site_label_1 
 _geom_angle_atom_site_label_2 
 _geom_angle_atom_site_label_3 
 _geom_angle 
 _geom_angle_site_symmetry_1 
 _geom_angle_site_symmetry_3 
 _geom_angle_publ_flag 
O1 C1 N1 127.2(5) . . ? 
O1 C1 N4 127.2(5) . . ? 
N1 C1 N4 105.5(4) . . ? 
N2 N1 C1 111.5(4) . . ? 
N3 N2 N1 172.1(5) . . ? 
N5 N4 C1 111.8(4) . . ? 
N6 N5 N4 172.6(6) . . ? 
 
_diffrn_measured_fraction_theta_max    0.992 
_diffrn_reflns_theta_full              60.87 
_diffrn_measured_fraction_theta_full   0.989 
_refine_diff_density_max    0.311 
_refine_diff_density_min   -0.344 
_refine_diff_density_rms    0.088 
